# Supplementary material
Source: PubMed Central journal article supplement (PMC3762250)
Supplement: NIHMS482365-supplement-Supplementary_Table.pdf [file NIHMS482365-supplement-Supplementary_Table.pdf]

**Supplementary Table 1: Semi-quantitative analysis of 5 $\alpha$ R2 immunoreactivity in major structures of the rat brain**

| <b>Brain regions</b>   | <b>Structure</b>               | <b>R2</b>                       | <b>Brain regions</b>           | <b>Structure</b>          | <b>R2</b>           |
|------------------------|--------------------------------|---------------------------------|--------------------------------|---------------------------|---------------------|
| <b>Olfactory areas</b> | Main olfactory bulb            | +++                             | <b>Thalamus</b>                | Medial                    | ++                  |
|                        | Olfactory tubercle             | +++                             |                                | Lateral                   | +++                 |
|                        | Olfactory tract                | +++                             |                                | Ventral                   | ++                  |
| <b>Cortical area</b>   | Frontal                        | +++                             | Dorsal                         | ++                        |                     |
|                        | Orbital                        | +++                             | Reticular nucleus              | +++                       |                     |
|                        | Cingulate area 1               | +++                             | Reuniens nucleus               | +++                       |                     |
|                        | Cingulate area 3               | +++                             | Medial geniculate nucleus      | +++                       |                     |
|                        | Motor                          | ++/+++                          | Lateral geniculate nucleus     | +++                       |                     |
|                        | Parietal                       | +++                             | <b>Hypothalamus</b>            | Paraventricular nucleus   | ++                  |
|                        | Piriform                       | +++                             | Lateral                        | ++                        |                     |
|                        | Entorhinal                     | +++                             | Dorsomedial                    | +                         |                     |
|                        | Insular                        | ++                              | Arcuate nucleus                | ++                        |                     |
|                        | <b>Basal ganglia</b>           | Caudate-putamen                 | + / ++                         | <b>Midbrain</b>           | Superior colliculus |
| Accumbens shell        |                                | +++                             | Inferior colliculus            | +                         |                     |
| Accumbens core         |                                | ++                              | Ventral tegmental area         | + / ++                    |                     |
| Globus pallidus        |                                | ++ / +++                        | Substantia nigra pars compacta | ++                        |                     |
| <b>Septum</b>          | ++ / +++                       | Substantia nigra pars reticular | +                              |                           |                     |
| <b>Amygdala</b>        | Basolateral amygdaloid nucleus | +++                             | <b>Pons</b>                    | Pontine nuclei            | +                   |
|                        | Cortical amygdaloid nucleus    | ++                              | <b>Rhombencephalon</b>         | Spinal trigeminal nucleus | ++                  |
|                        | Central amygdaloid nucleus     | ++                              | Locus coeruleus                | +++                       |                     |
| <b>Hippocampus</b>     | CA1 field of Ammon's horn      | ++                              | Vestibular nuclei              | ++                        |                     |
|                        | CA2 field of Ammon's horn      | ++                              | Dorsal raphe nuclei            | ++                        |                     |
|                        | CA3 field of Ammon's horn      | +++                             | Medial raphe nuclei            | ++                        |                     |
|                        | Dentate gyrus                  | +                               | Inferior olivary nucleus       | ++ / +++                  |                     |
| <b>Habenula</b>        | Lateral                        | +                               | <b>Cerebellum</b>              | Purkinje cells            | +++                 |
|                        | Medial                         | ++                              | Molecular layer (Mo)           | -                         |                     |
|                        |                                |                                 | Granule layer (Gr)             | -                         |                     |

The degree of immunostaining intensity of 5 $\alpha$ R2 immunoreactivity is : (+++) intense, (++) moderate, (+) weak and (-) absent. Intermediate scores are also noted because a given region often contained additional staining intensities that were readily distinguished.
